# Supplementary material
Source: bioRxiv or medRxiv preprint supplement (https://www.biorxiv.org/highwire/filestream/69036/field_highwire_adjunct_files/11/216754-2.pdf)

Supplementary Figure 2

Bladder cancer

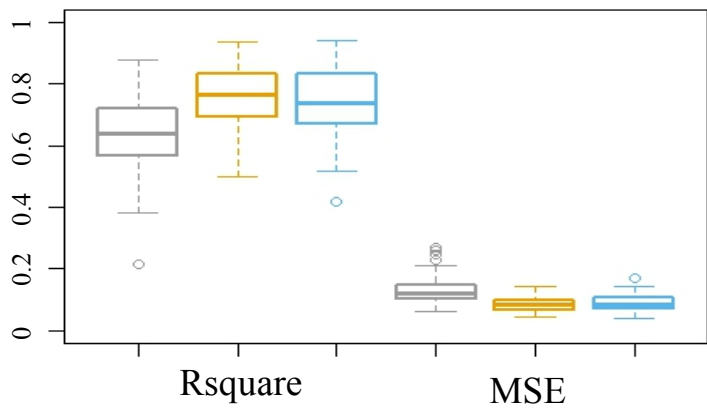

Breast cancer

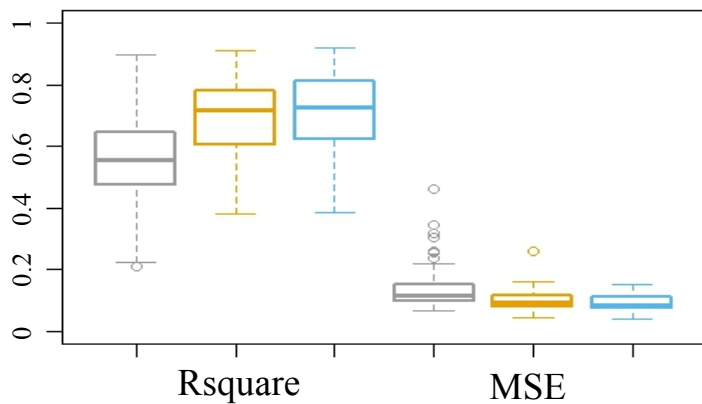

Colorectal cancer

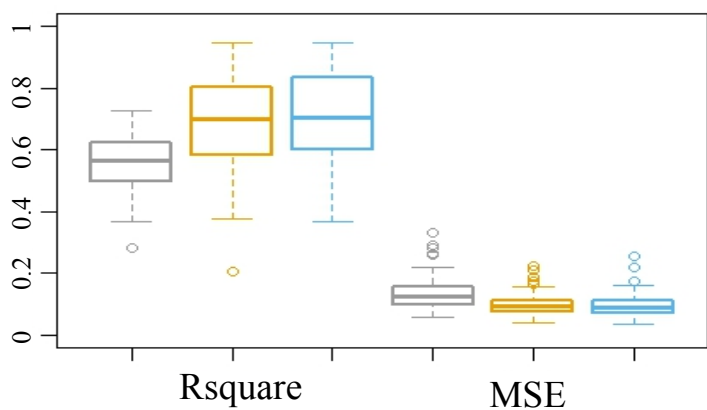

Glioblastoma

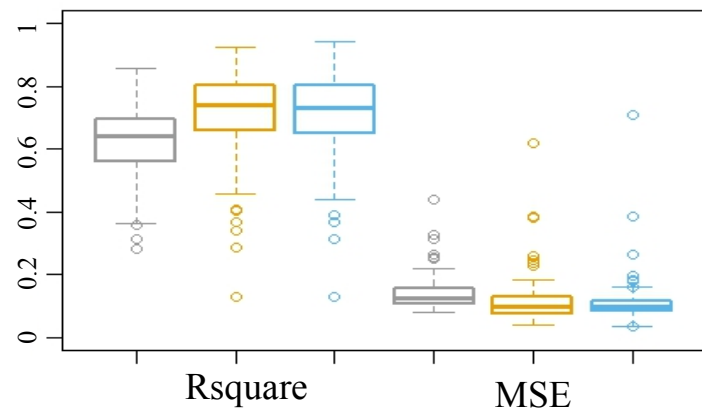

Head and Neck cancer

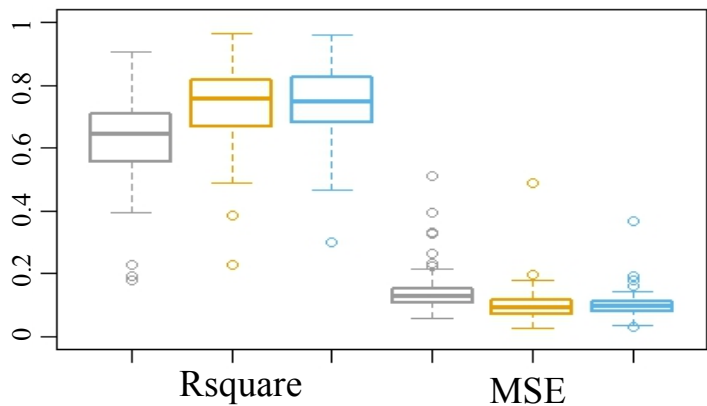

Kidney cancer

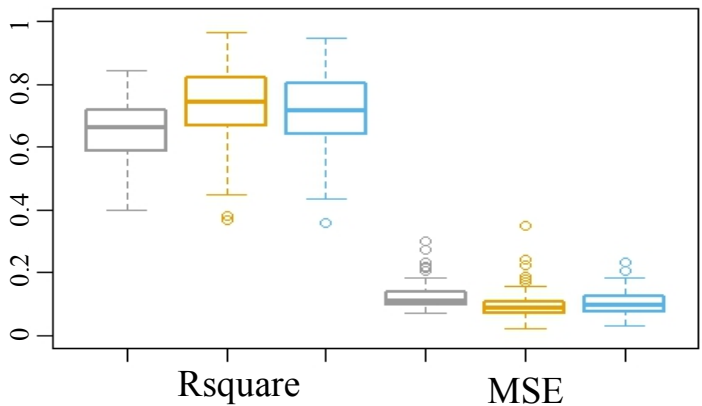

AML

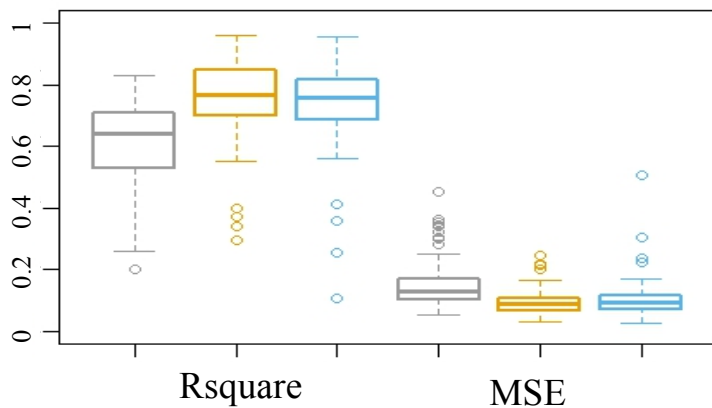

Lung adenocarcinoma

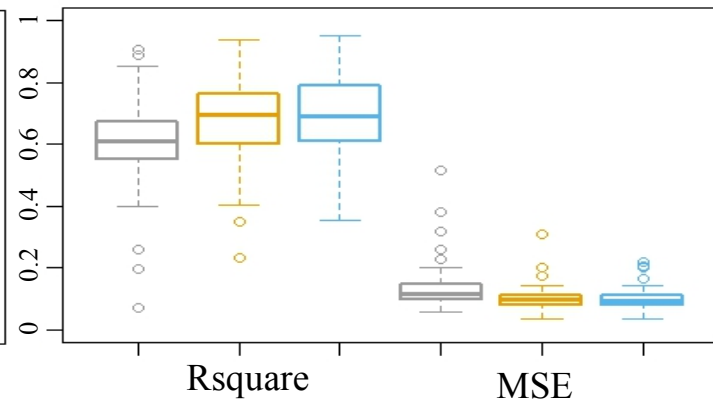

Lung squamous cell carcinoma

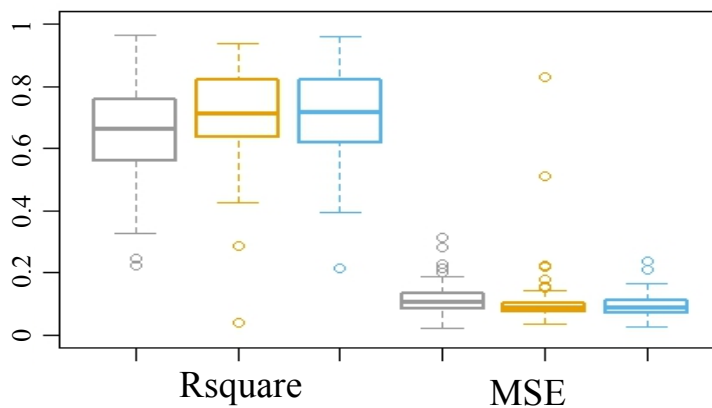

Ovarian cancer

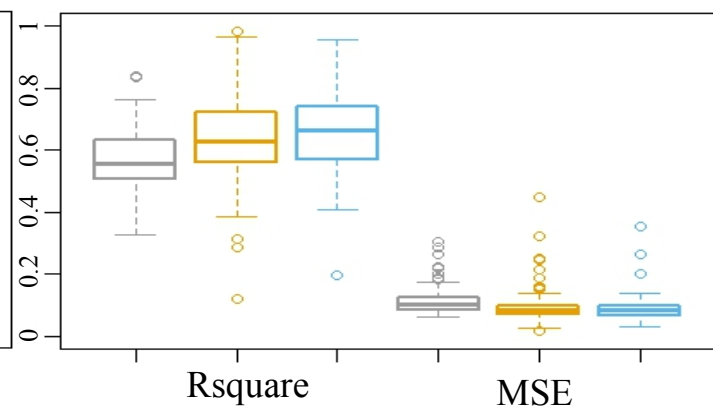

Endometrial cancer

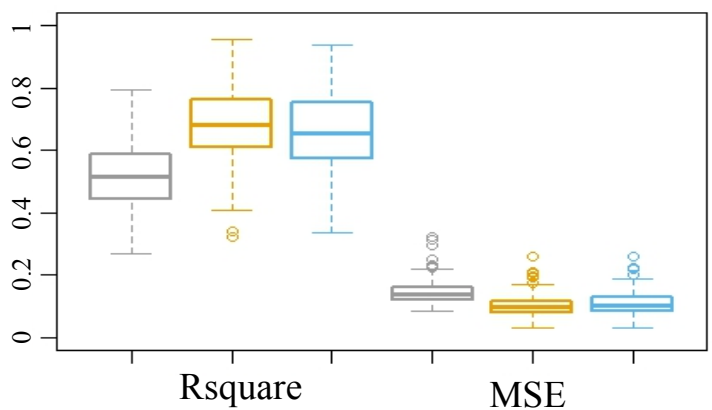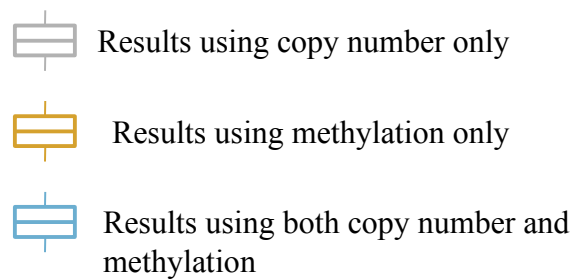

Supplement: Supplementary file [file 216754-2.pdf]
